# Supplementary material for: Transition metal based single chained surfactants: synthesis, aggregation behavior and enhanced photoluminescence properties of fluorescein
Source: Royal Society of Chemistry journal article supplement (doi:10.1039/c6ra21811c), 2016-01-01
Supplement: c6ra21811c1.pdf [file c6ra21811c1.pdf]

**Transition metal based surfactants: synthesis, aggregation behavior and enhanced  
photoluminescence properties of fluorescein**

Preeti Garg, Gurpreet Kaur,\* and Ganga Ram Chaudhary\*

Department of Chemistry and Centre of Advanced studies in Chemistry, Panjab University,  
Chandigarh

Corresponding authors

Gurpreet Kaur ([gurpreet14@pu.ac.in](mailto:gurpreet14@pu.ac.in))

Tel: 911722534431

Ganga Ram Chaudhary ([grc22@pu.ac.in](mailto:grc22@pu.ac.in))

Tel: 911722534406

Fax: +91-172-2545074

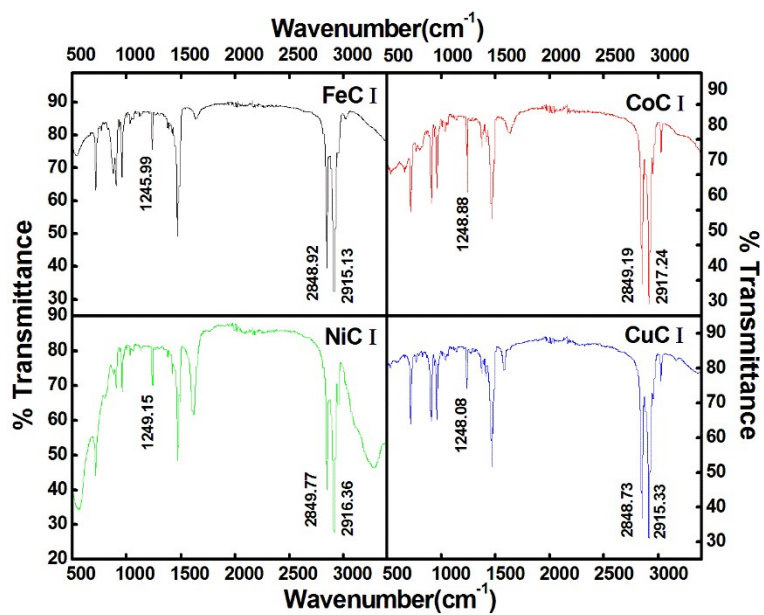

**Fig. ES1.** FTIR spectra of Metal complexes.

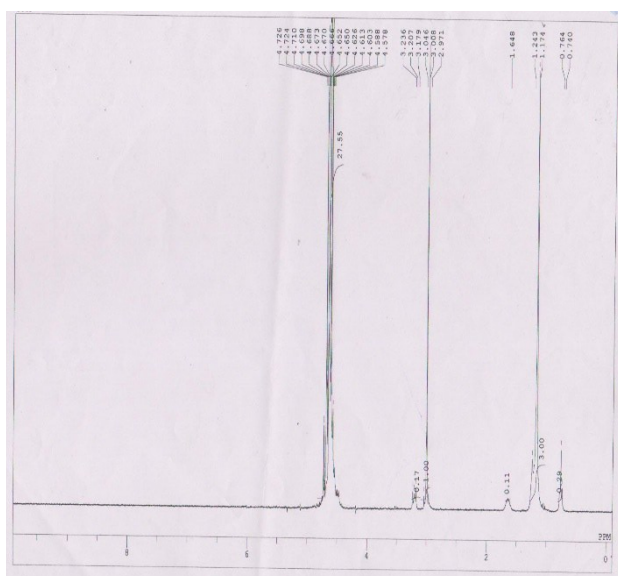

**(a)**

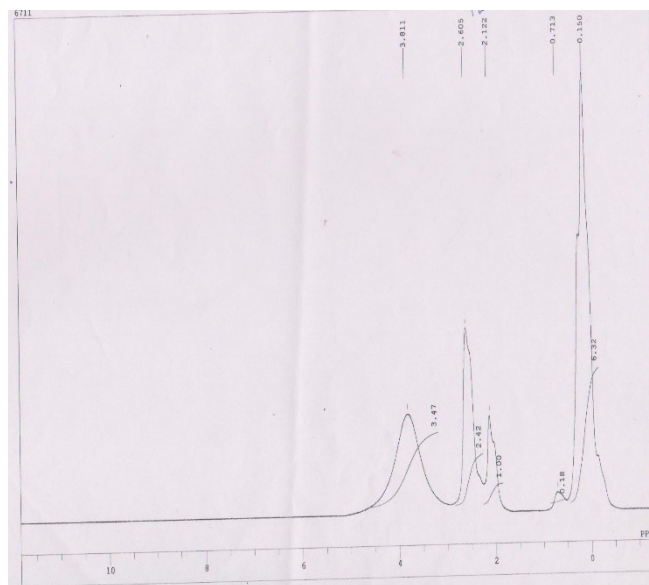

**(b)**

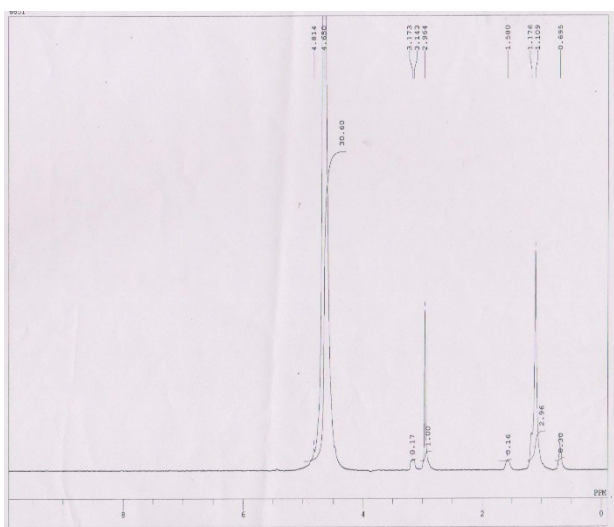

(c)

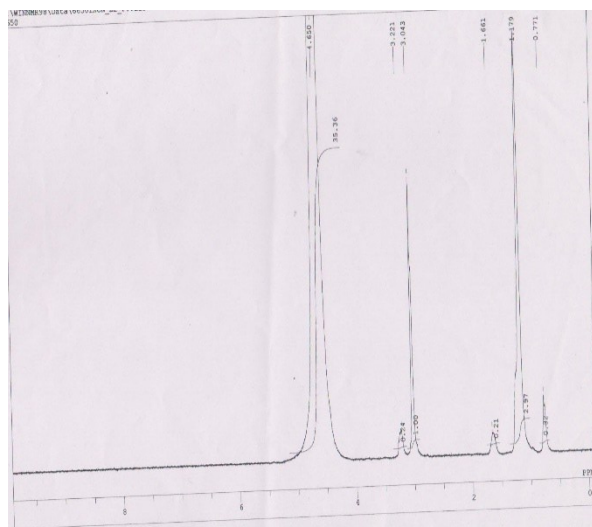

(d)

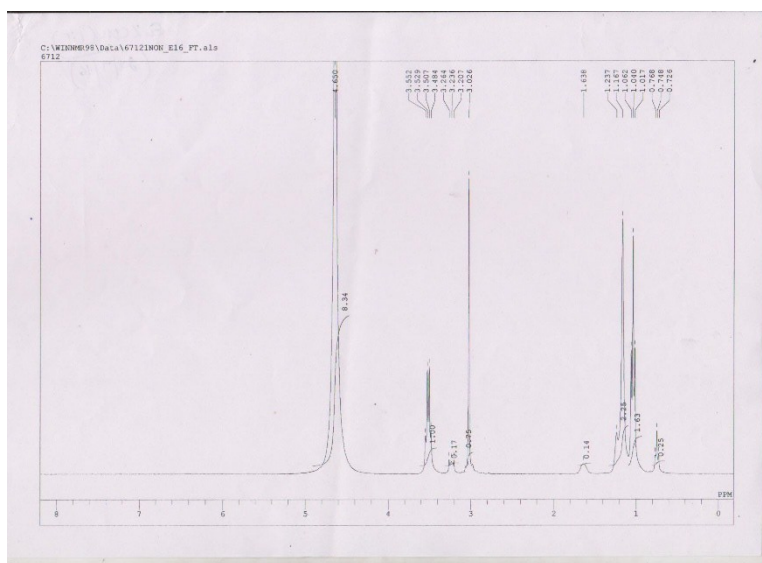

(e)

**Fig. ES2.** <sup>1</sup>H- NMR spectra of (a) CTAC (b) FeCl (c) CoC I (d) NiC I (e) CuC I.

## THERMOGRAVIMETRIC METHODS AND THEIR EQUATIONS

The five different methods were applied for evaluation the kinetic and thermodynamic parameters of metal complexes for the decomposition of step-1.

(i) CR method

$$g(\alpha) = \frac{ART^2}{\beta E} \left[ 1 - \frac{2RT}{E} \right] e^{-E/RT} \quad (S1)$$

Taking natural log

$$-\ln \frac{g(\alpha)}{T^2} = -\ln \frac{AR}{\beta E} \left[ 1 - \frac{2RT}{E} \right] + \frac{E}{RT} \quad (S2)$$

The fraction mass loss ( $\alpha$ ) and corresponding  $(1-\alpha)^n$  are calculated from TG curves, where  $n$  depends upon the reaction model.

$$-\log \frac{1 - (1-\alpha)^{1-n}}{T^2(1-n)} = \log \frac{AR}{\beta E} \left[ 1 - \frac{2RT}{E} \right] - \frac{E}{2.303RT} \text{ for } n \neq 1 \quad (S3)$$

$$-\log \frac{-\log(1-\alpha)}{T^2} = \log \frac{AR}{\beta E} \left[ 1 - \frac{2RT}{E} \right] - \frac{E}{2.303RT} \text{ for } n=1 \quad (S4)$$

A straight plot between the left hand side of the above equations against  $1/T$  gives the slope ( $-2.303E/R$ ) and the intercept ( $A$ ).

(ii)MKN method

$$-\ln \frac{g(\alpha)}{T^{1.9206}} = -\ln \frac{AR}{\beta E} + 3.7678 - 1.9206 \ln E - 0.12040 \frac{E}{RT} \quad (S5)$$

(iii) WYHC method

$$-\ln \frac{g(\alpha)}{T^{1.8946}} = -\ln \frac{AR}{\beta E} + 3.6350 - 1.8946 \ln E - 1.0014 \frac{E}{RT} \quad (S6)$$

(iv) VK method

$$\ln g(\alpha) = \ln \left( \frac{A(0.368/T_m)^{\frac{E_a}{RT_m}}}{\beta \left( \frac{E_a}{RT_m} + 1 \right)} \right) + \left( \frac{E_a}{RT_m} + 1 \right) \ln T \quad (S7)$$

(v) HM method

Parameter  $T = T_m + \theta$  is used here. If the order of reaction is 1,  $T_m$  is defined as the temperature at which  $(1 - \alpha)_m = 1/e = 0.368$  and therefore

$$\ln \ln(\alpha) = \frac{E\theta}{RT_m^2} \quad (S8)$$

Here, symbols  $\beta$ ,  $T_m$ ,  $E$ ,  $A$ ,  $R$  are heating rate, DTG peak temperature, activation energy ( $\text{kJmol}^{-1}$ ), pre-exponential factor ( $\text{min}^{-1}$ ) and gas constant ( $8.314 \text{ Jmol}^{-1}\text{K}^{-1}$ ), respectively.

Other parameters  $\Delta H$ ,  $\Delta S$  and  $\Delta G$  were calculated using following equations.

$$\Delta S = 2.303 \log[Ah/kT]R \quad (S9)$$

$$\Delta H = E - RT \quad (S10)$$

$$\Delta G = \Delta H - T\Delta S \quad (S11)$$

where,  $h$ ,  $T$ ,  $A$  and  $k$  is Planck constant, temperature in K, Arrhenius constant or frequency factor and Boltzmann constant respectively.

(a)

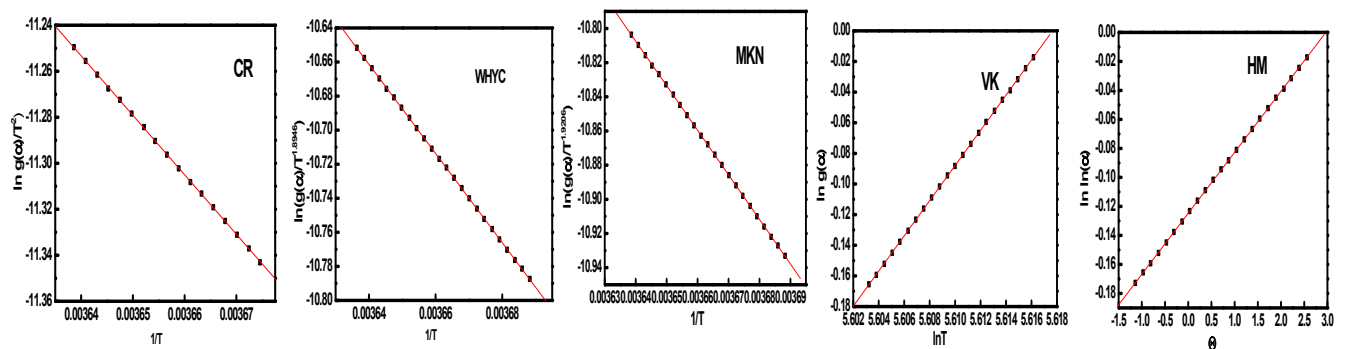

(b)

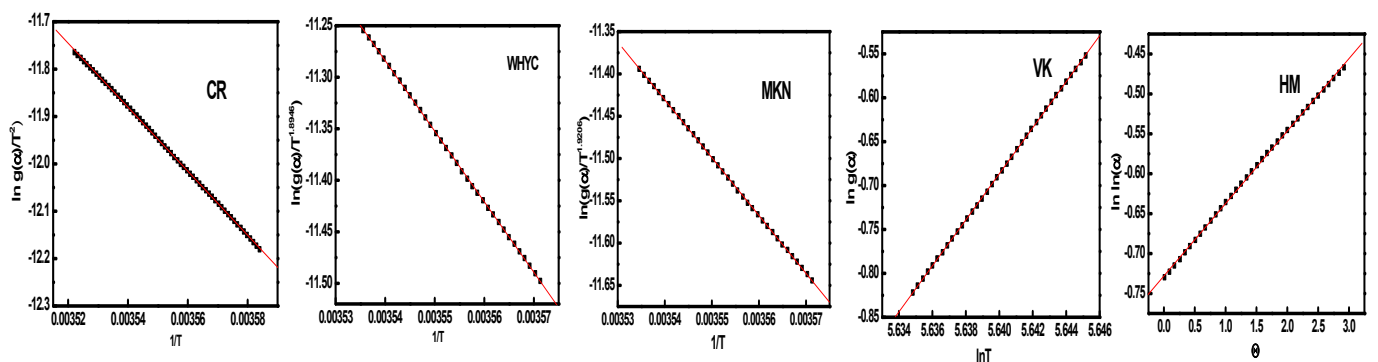

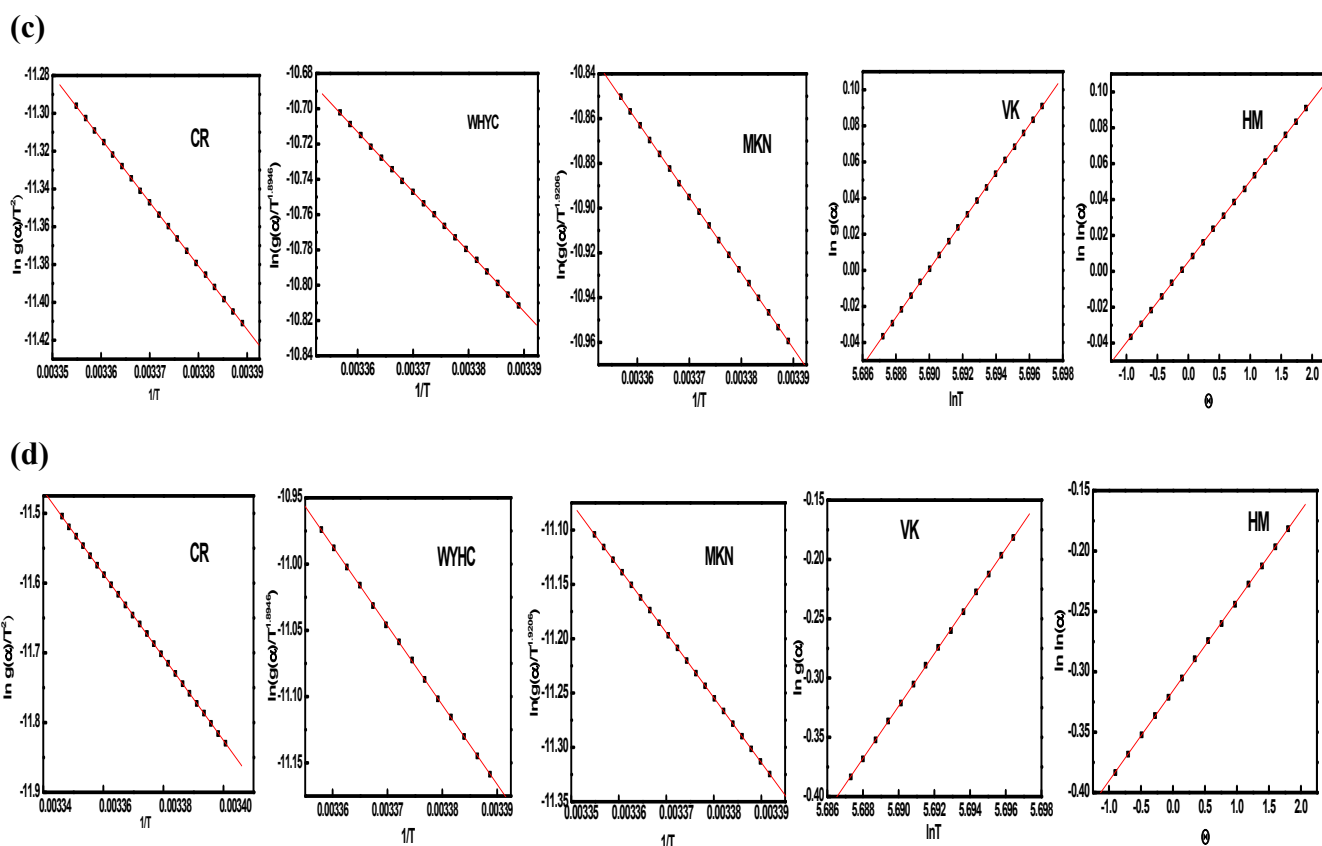

**Fig. ES3.** Linearization curves obtained by different methods for (a) FeC I (b) CoC I (c) NiC I (d) CuC I.

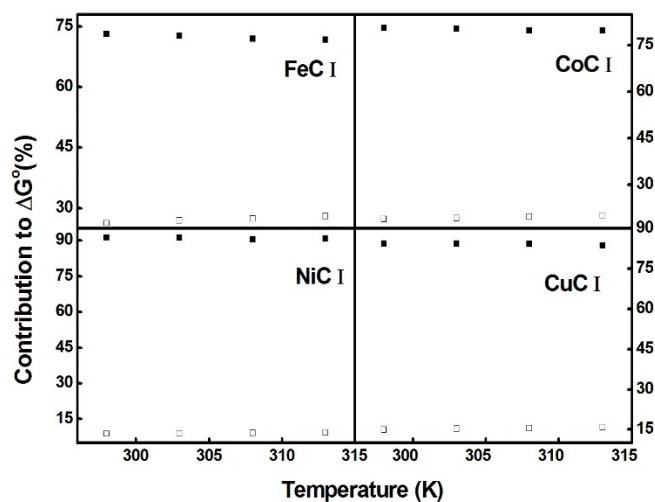

**Fig. ES4.** Enthalpic (□) and Entropic (■) contributions to  $\Delta G^{\circ}$  for metal complexes

**Table ES1.C, H and N value of metal complexes with metal content.**

| Metal complexes | Experimental (%)          | Calculated (%)            | Metal content(ppm) |
|-----------------|---------------------------|---------------------------|--------------------|
| FeCl            | C=49.94, H=9.657, N=2.701 | C=51.03, H=9.40, N=3.31   | 2.34               |
| CoCl            | C=50.16, H=9.467, N=3.161 | C=50.68, H=9.337, N=3.110 | 2.01               |
| NiCl            | C=41.19, H=8.690, N=2.422 | C=40.88, H=7.539, N=2.510 | 3.11               |
| CuCl            | C=47.12, H=8.947, N=2.974 | C=46.48, H=8.563, N=2.854 | 4.15               |

**Table ES2. Vibrational peaks of CTAC and metal complexes**

| Modes of Vibration                                | pure CTAC (cm <sup>-1</sup> ) | FeC I   | CoC I   | NiC I   | CuC I   |
|---------------------------------------------------|-------------------------------|---------|---------|---------|---------|
| -CH <sub>2</sub> - asym stretching                | 2915.26                       | 2915.13 | 2917.24 | 2916.36 | 2915.33 |
| -CH <sub>3</sub> - sym stretching                 | 2848.41                       | 2848.92 | 2849.19 | 2849.77 | 2848.73 |
| -CH <sub>2</sub> -CH <sub>2</sub> - stretching    | 1470.16                       | 1470.15 | 1471.26 | 1471.67 | 1470.30 |
| N-(CH <sub>3</sub> ) <sub>3</sub> -sym stretching | 1260.25                       | 1245.99 | 1248.88 | 1249.15 | 1248.08 |
| Terminal Cl                                       | 325                           | 362.29  | 341.76  | 358.67  | 324.87  |
| Bridging Cl                                       | -                             | 281.06  | 279.87  | 282.20  | 283.85  |

**Table ES3.** <sup>1</sup>H NMR chemical shifts (ppm) of CTAC and metal complexes except FeC I in D<sub>2</sub>O.

| Complex | $\nu_{\text{Terminal CH}_3}$ | $\nu_{\text{N(CH}_3)_3}$ | $\nu_{\text{CH}_2}$ | $\nu_{\alpha\text{-CH}_2}$ | $\nu_{\beta\text{-CH}_2}$ |
|---------|------------------------------|--------------------------|---------------------|----------------------------|---------------------------|
| CTAC    | 0.74                         | 3.04                     | 1.174               | 1.64                       | 3.20                      |
| CoC I   | 0.69                         | 2.96                     | 1.176               | 1.58                       | 3.14                      |
| NiC I   | 0.77                         | 3.04                     | 1.179               | 1.66                       | 3.22                      |
| CuC I   | 0.72                         | 3.02                     | 1.167               | 1.63                       | 3.23                      |

**Table ES4.** Thermodynamic decomposition parameters for the metal complexes using TGA.

| Complex | A/min <sup>-1</sup>   | $\Delta G$ /kJmol <sup>-1</sup> | $\Delta H$ /kJmol <sup>-1</sup> | $\Delta S$ /JK <sup>-1</sup> mol <sup>-1</sup> |
|---------|-----------------------|---------------------------------|---------------------------------|------------------------------------------------|
| FeC I   | 5.060×10 <sup>6</sup> | 22.443                          | 19.217                          | -11.83                                         |

|       |                       |        |        |        |
|-------|-----------------------|--------|--------|--------|
| CoC I | 1.318×10 <sup>6</sup> | 37.541 | 33.835 | -13.19 |
| NiC I | 0.974×10 <sup>6</sup> | 29.847 | 25.547 | -13.54 |
| CuC I | 1.688×10 <sup>6</sup> | 51.237 | 47.395 | -12.98 |

**Table ES5.** Values of  $T_c$ ,  $\sigma$  and  $\Delta C_p^\circ$  for metal complexes using conductivity measurement.

| Complex | $T_c$ (K) | $\sigma$ | (-) $\Delta C_p^\circ$ (kJmol <sup>-1</sup> K <sup>-1</sup> ) |
|---------|-----------|----------|---------------------------------------------------------------|
| FeC I   | 102.2     | 0.2036   | 0.028                                                         |
| CoC I   | 100.4     | 0.1449   | 0.029                                                         |
| NiC I   | 97.8      | 0.0821   | 0.082                                                         |
| CuC I   | 96.1      | 0.0383   | 0.077                                                         |
